# Supplementary material
Source: ML conference proceedings conference paper supplement (https://proceedings.mlr.press/v119/luo20b.html)
Supplement: Supplementary file [file luo20b-supp.pdf]

---

## Supplementary Material: Progressive Graph Learning for Open-Set Domain Adaptation

---

### 1. Proof for Theorem 2.1

*Proof.* Let  $h^*$  be the idea joint classifier which minimizes the combined error,

$$h^* = \arg \min_{h \in \mathcal{H}} R_s(h) + R_t^*(h). \quad (1)$$

Given the definition of target risk, we have,

$$R_t(h) = \sum_{i=1}^C \pi_i^t R_{t,i}(h) + \pi_{C+1}^t R_{t,C+1}(h). \quad (2)$$

For brevity, we denote the first term as  $R_t^*(h)$  and the second term as  $\Delta_o$ . Then,

$$\begin{aligned} R_t(h) &= R_t^*(h) + \Delta_o, \\ &\leq R_t^*(h^*) + (1 - \pi_{C+1}^t) \mathbb{E}_{\mathbb{Q}_{X|Y \leq C}^t} \mathcal{L}(h, h^*) + \Delta_o, \\ &\leq R_t^*(h^*) + (1 - \pi_{C+1}^t) (\mathbb{E}_{\mathbb{P}_X^s} \mathcal{L}(h, h^*) \\ &\quad + \text{disc}(\mathbb{Q}_{X|Y \leq C}^t, \mathbb{P}_X^s)) + \Delta_o. \end{aligned} \quad (3)$$

Based on the triangle inequality we have,

$$\begin{aligned} \mathbb{P}_X^s \mathcal{L}(h, h^*) &\leq \mathbb{P}_X^s \mathcal{L}(h, i) + \mathbb{P}_X^s \mathcal{L}(h^*, i), \\ &\leq R_s(h) + R_s(h^*). \end{aligned} \quad (4)$$

Thus, the Equation 3 can be rewritten as,

$$\begin{aligned} R_t(h) &\leq R_t^*(h^*) + (1 - \pi_{C+1}^t) (R_s(h) + R_s(h^*)) \\ &\quad + \text{disc}(\mathbb{Q}_{X|Y \leq C}^t, \mathbb{P}_X^s) + \Delta_o. \end{aligned} \quad (5)$$

Lastly, we can easily obtain,

$$\begin{aligned} \frac{R_t(h)}{1 - \pi_{C+1}^t} &\leq R_s(h) + \text{disc}(\mathbb{Q}_{X|Y \leq C}^t, \mathbb{P}_X^s) + \lambda \\ &\quad + \frac{\pi_{C+1}^t}{1 - \pi_{C+1}^t} R_{t,C+1}(h), \end{aligned} \quad (6)$$

where the shared error  $\lambda = \min_{h \in \mathcal{H}} \frac{R_t^*(h)}{1 - \pi_{C+1}^t} + R_s(h)$ . ■

### 2. Proof for Theorem 3.1

*Proof.* By definition, the target risk with the shared classifier  $\tilde{h} \in \mathcal{H}_1$  and the pseudo labeling function  $h_b \in \mathcal{H}_2$  can

be represented as,

$$\begin{aligned} R_t(\tilde{h}, h_b) &= (1 - \pi_\alpha) R_t^*(\tilde{h}) + \pi_\alpha R_t^*(h_b) \\ &\quad + \pi_\alpha \pi_{C+1}^t R_{t,C+1}(h_b) + \delta, \end{aligned} \quad (7)$$

where  $\delta = (1 - \pi_\alpha) \cdot \text{const}$  denotes the constant since the loss function  $\mathcal{L}(\cdot, \cdot)$  is bounded. Let  $h^*$  be the idea shared classifier which minimizes the combined error,

$$h^* = \arg \min_{\tilde{h} \in \mathcal{H}_1} R_s(h) + R_t^*(h). \quad (8)$$

Now we consider,

$$\begin{aligned} R_t(\tilde{h}, h_b) &\leq (1 - \pi_\alpha) [R_t^*(h^*) + (1 - \pi_{C+1}^t) \mathbb{E}_{\mathbb{Q}_{XY|Y \leq C}^t} \mathcal{L}(\tilde{h}, h^*)] \\ &\quad + \pi_\alpha [R_t^*(h_b) + \pi_{C+1}^t R_{t,C+1}(h_b)] + \delta, \\ &\leq (1 - \pi_\alpha) [R_t^*(h^*) + (1 - \pi_{C+1}^t) (\mathbb{E}_{\mathbb{P}_X^s} \mathcal{L}(\tilde{h}, h^*) \\ &\quad + \text{disc}(\mathbb{Q}_{X|Y \leq C}^t, \mathbb{P}_X^s))] + \pi_\alpha [\pi_{C+1}^t R_{t,C+1}(h_b) \\ &\quad + R_t^*(h_b)] + \delta. \end{aligned} \quad (9)$$

Based on the triangle inequality we have,

$$\begin{aligned} \mathbb{P}_X^s \mathcal{L}(\tilde{h}, h^*) &\leq \mathbb{P}_X^s \mathcal{L}(\tilde{h}, i) + \mathbb{P}_X^s \mathcal{L}(h^*, i), \\ &\leq R_s(\tilde{h}) + R_s(h^*). \end{aligned} \quad (10)$$

Therefore, we can reformulate the original inequality in the following,

$$\begin{aligned} R_t(\tilde{h}, h_b) &\leq (1 - \pi_\alpha) [R_t^*(h^*) + (1 - \pi_{C+1}^t) (R_s(\tilde{h}) + R_s(h^*)) \\ &\quad + \text{disc}(\mathbb{Q}_{X|Y \leq C}^t, \mathbb{P}_X^s)] \\ &\quad + \pi_\alpha [\pi_{C+1}^t R_{t,C+1}(h_b) + R_t^*(h_b)] + \delta. \end{aligned} \quad (11)$$

As the index-based thresholds  $\alpha_u^{(m)}, \alpha_k^{(m)} \rightarrow \alpha^*$ , we have  $R_t^*(h_b) \rightarrow R_t^*(h)$ . The equation (11) can be transformed into,

$$\begin{aligned} \frac{R_t(\tilde{h}, h_b)}{1 - \pi_{C+1}^t} &\leq (1 - \pi_\alpha) (R_s(\tilde{h}) + \text{disc}(\mathbb{Q}_{X|Y \leq C}^t, \mathbb{P}_X^s)) + \lambda \\ &\quad + \frac{\pi_\alpha \pi_{C+1}^t}{1 - \pi_{C+1}^t} R_{t,C+1}(h_b) + \delta, \end{aligned} \quad (12)$$

where  $\lambda = \min_{\tilde{h} \in \mathcal{H}_1} (1 - \pi_\alpha) R_s(\tilde{h}) + \frac{R_t^*(\tilde{h})}{1 - \pi_{C+1}^t}$ . ■
